# Supplementary material
Source: PubMed Central journal article supplement (PMC4299137)
Supplement: supp_142.1.21_DEV116418supp.pdf [file supp_142.1.21_DEV116418supp.pdf]

## **Supplemental Materials and Methods**

### **Histology, immunohistochemistry and immunocytochemistry**

For EPDC labeling, background fluorescence was quenched with 3% H<sub>2</sub>O<sub>2</sub> in methanol at 4°C overnight. All samples were permeabilized in 0.2% Triton X-100 in PBS (PBT) for 5 min (cells), 0.1% PBT for 10 min (cryosections), or antigen retrieval buffer (DAKO) for 10 min in a pressure-cooker (paraffin sections). Non-specific binding was blocked by incubation with 5-10% serum in PBS or Antibody diluent (DAKO) for 30 min at RT. Source of serum was selected based on host of secondary antibody: goat (Vector Laboratories) or donkey (Jackson Immuno Research). Primary antibodies listed in Supplemental Table S3 were diluted in either PBS (cells), 5-10% serum in 0.1% PBT (cryosections), or Antibody Diluent (DAKO, paraffin sections) and added to slides at 4°C overnight. Slides were then incubated with fluorescent-conjugated secondary antibodies (1:200) for 1 hr at RT: donkey (Jackson Immuno Research) anti-goat 488, anti-rabbit Cy3, or anti-rat 405, and goat (Life Technologies) anti-chicken 488, anti-mouse 488 or 594, anti-rabbit 488 or 594, or anti-rat 647. Slides were either mounted with TOPRO-3 Iodide (Life Technologies) or mounting media with DAPI (Vector Laboratories).

### **Cell culture**

For MRTF-A overexpression experiments in EMCs, cells were serum-starved for 24 hrs then transduced with adenovirus expressing HA-MRTF-A or  $\beta$ gal ( $\sim 4.0 \times 10^4$  pfu/ml) for an additional 24 hrs in serum-free media. To determine MRTF antibody specificity, COS-7 cells were transfected with 1  $\mu$ g of empty vector or plasmid expressing Flag-MRTF-A or Flag-MRTF-B using Lipofectamine 2000 (Invitrogen) per manufacturer's instructions and processed for protein isolation.

### **RNA isolation and analysis**

Total RNA was isolated from cell cultures and tissue samples using Trizol reagent (Life Technologies) and cDNA was generated using iScript cDNA Synthesis Kit (Bio-Rad) following manufacturer's protocol. To increase yield from epicardial explants, 5-10 ng of glycogen (Life Technologies) was added prior to RNA precipitation. Gene expression was examined by standard RT-PCR methods or qPCR using iQ SYBR Green Supermix (Bio-Rad) and the CFX Connect Real-Time PCR Detection System (Bio-Rad). Relative mRNA levels were normalized to *Gapdh* and calculated using the  $2^{-\Delta\Delta CT}$  method.

### **Supplemental References**

Austin, A.F., Compton, L.A., Love, J.D., Brown, C.B., and Barnett, J.V. (2008). Primary and immortalized mouse epicardial cells undergo differentiation in response to TGFbeta. *Developmental dynamics : an official publication of the American Association of Anatomists* **237**, 366-376.

Wada, A.M., Smith, T.K., Osler, M.E., Reese, D.E., and Bader, D.M. (2003). Epicardial/Mesothelial cell line retains vasculogenic potential of embryonic epicardium. *Circ Res* **92**, 525-531.

Supplemental Figures

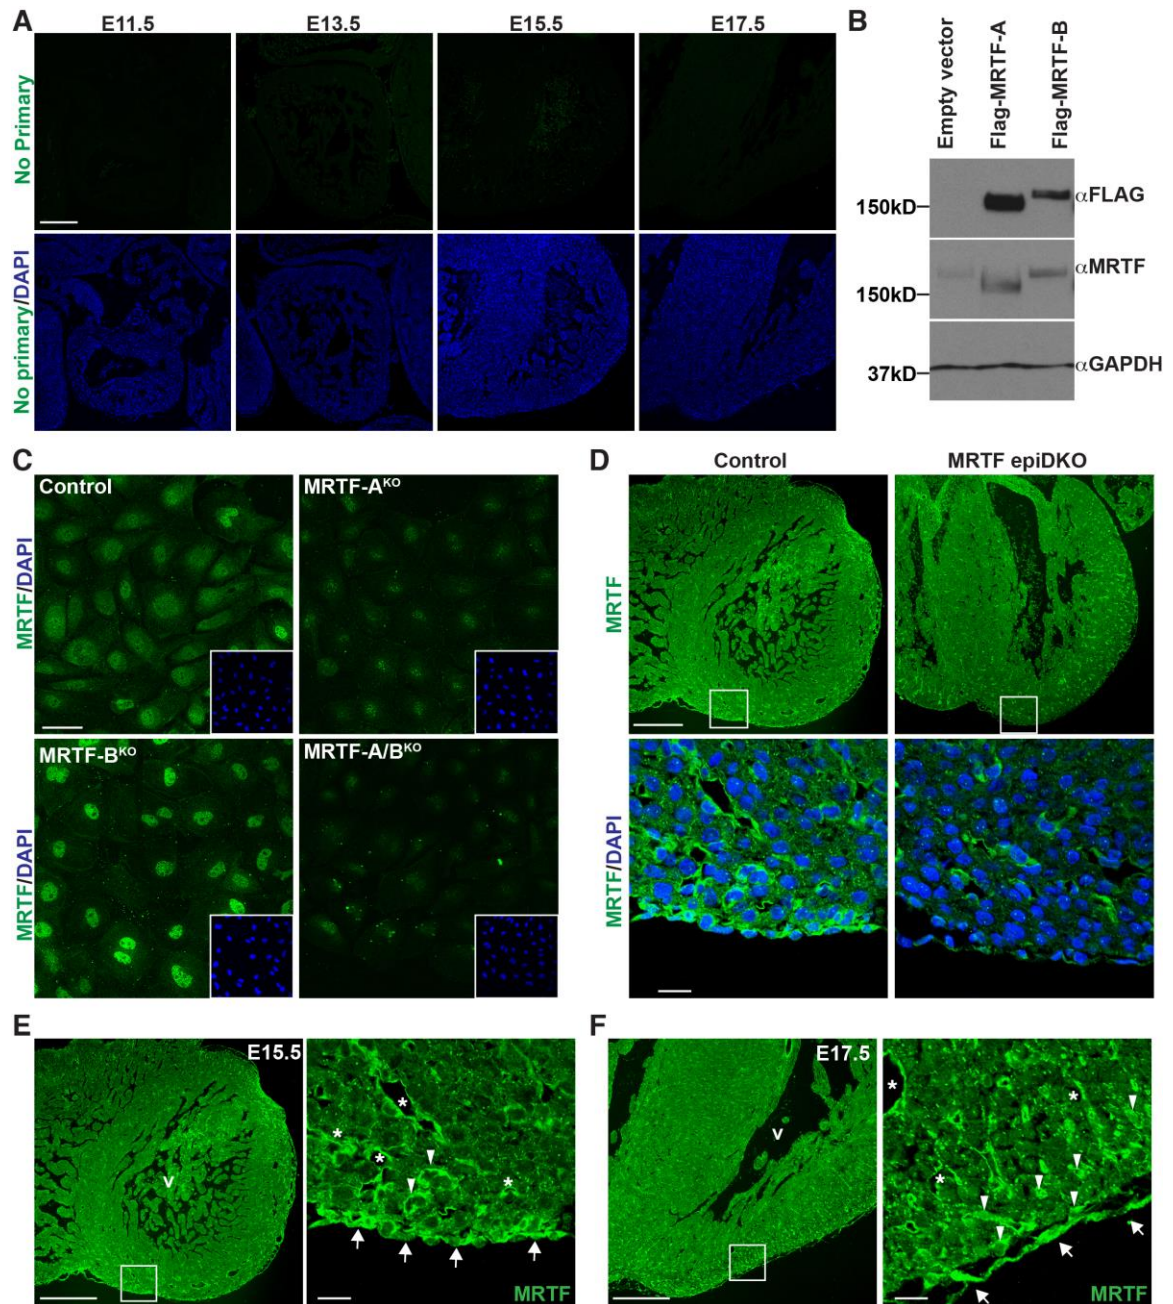

**Fig. S1. Anti-MRTF antibody recognizes MRTF-A and MRTF-B**

(A) No primary antibody control immunofluorescence performed in parallel to MRTF immunostaining. All images were captured under the same settings as those presented in Fig. S1E, F. Scale bar: 250  $\mu$ m. (B) Western blot analysis of COS-7

cells transfected with Flag-tagged constructs reveals MRTF antibody detects both MRTF-A and MRTF-B. Empty vector control lane demonstrates detection of endogenous MRTF-B. (C) MRTF immunostaining of primary EPDCs isolated from the following embryos and cultured in 10% FBS to elicit nuclear accumulation: Control (*Wt1*<sup>+/+</sup>; *Mrtfa*<sup>+/+</sup>; *Mrtfb*<sup>fl/fl</sup>); MRTF-A<sup>KO</sup> (*Wt1*<sup>+/+</sup>; *Mrtfa*<sup>-/-</sup>; *Mrtfb*<sup>fl/fl</sup>); MRTF-B<sup>KO</sup> (*Wt1*<sup>CreERT2/+</sup>; *Mrtfa*<sup>+/+</sup>; *Mrtfb*<sup>fl/fl</sup>); and MRTF-A/B<sup>KO</sup> (*Wt1*<sup>CreERT2/+</sup>; *Mrtfa*<sup>-/-</sup>; *Mrtfb*<sup>fl/fl</sup>). Embryos were isolated from pregnant dams gavaged with 4-hydroxytamoxifen at E9.5 and E10.5. Scale bar: 50  $\mu$ m. (D) E15.5 hearts were collected from wildtype C57BL/6 (Control) or MRTF<sup>epiDKO</sup> embryos. Global deletion of MRTF-A and epicardial deletion of MRTF-B leads to attenuation of MRTF protein levels, particularly in the epicardium and sub-epicardium as demonstrated by immunostaining with an anti-MRTF antibody (green). White box in upper panel (10X magnification, scale bar: 250  $\mu$ m) identifies area shown in lower panel (80X magnification, scale bar: 20  $\mu$ m). (E, F) Expression of MRTFs in E15.5 (E) and E17.5 (F) hearts. Arrows mark epicardium, arrowheads mark interstitial cells, and asterisks mark vessels. White box in left panel (10X magnification, scale bar: 250  $\mu$ m) identifies area shown in right panel (80X magnification, scale bar: 20  $\mu$ m). v, ventricle.

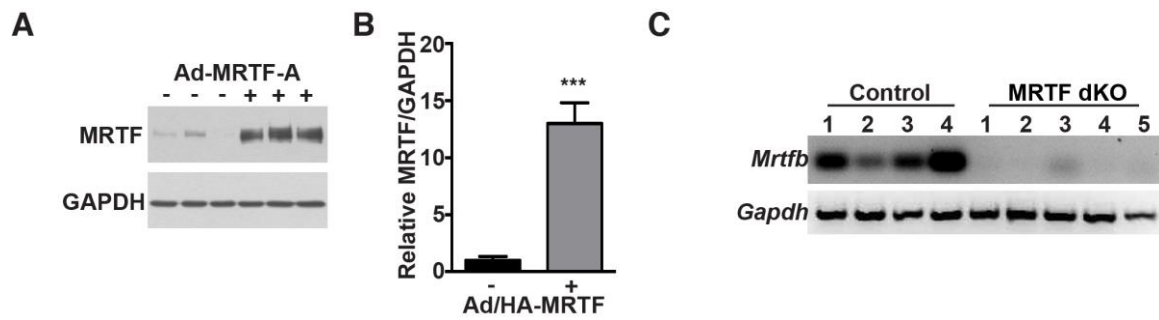

**Fig. S2. Modulation of MRTF expression levels**

(A) Western blot analysis for endogenous MRTF protein in EMCs transduced with adenoviruses expressing HA-epitope tagged MRTF-A (Ad/MRTF-A) or  $\beta$ gal (Control). Control lanes demonstrate detection of endogenous MRTF. (B) Quantification of (A). (C) EPDCs isolated from *Mrtfa*<sup>-/-</sup>; *Mrtfb*<sup>fl/fl</sup> embryos were transduced with Ad/ $\beta$ gal (Control) or Ad/Cre (MRTF dKO). RT-PCR confirms efficient Cre-dependent *Mrtfb* deletion in 4-5 independent samples.



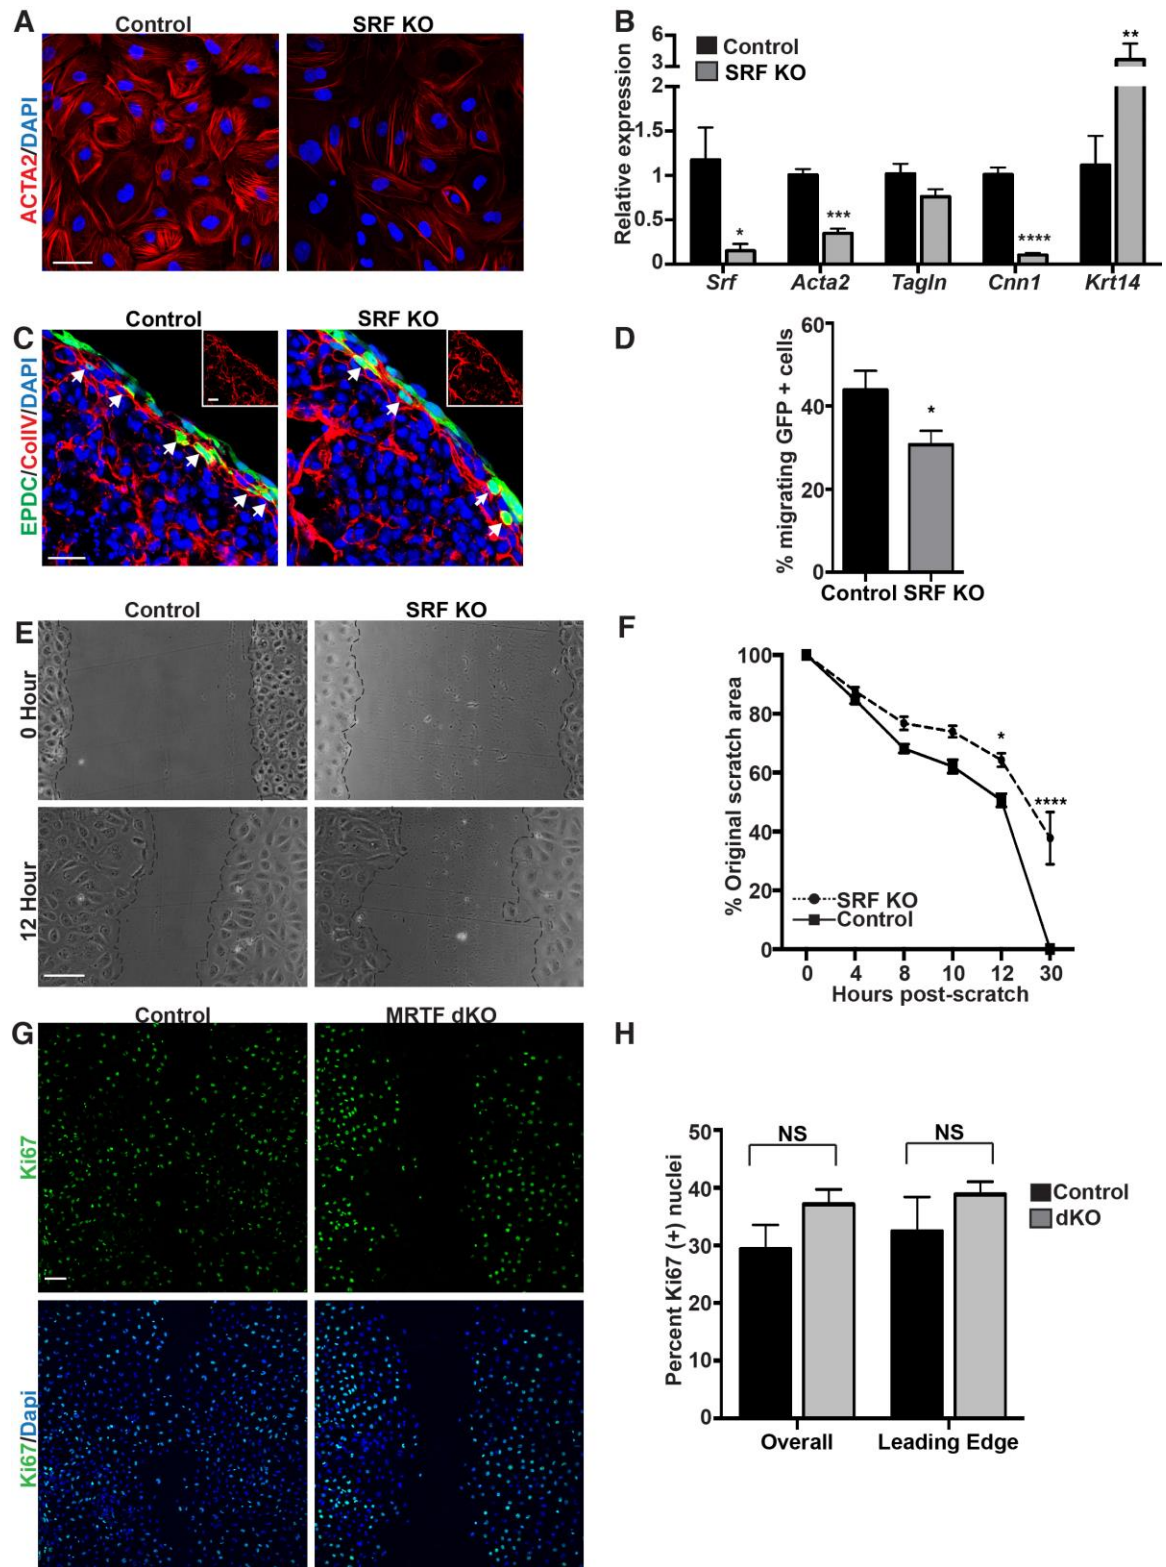

**Fig. S3. SRF/MRTFs are essential for epicardial cell migration**

(A, B) ACTA2 immunostaining (A) and qPCR analysis (B) of EPDCs isolated from *Srf*<sup>fl/fl</sup> embryos and transduced with Ad/βgal (Control) or Ad/Cre (SRF KO). *n* = 7

(Control) and  $n = 9$  (SRF KO). **(C, D)** Hearts from E12.5 *Srf*<sup>fl/fl</sup> embryos explanted and co-transduced with Ad/GFP to label the epicardium and Ad/ $\beta$ gal (Control) Ad/Cre (SRF KO). **(C)** Immunostaining for GFP (green) and ColIV (red) reveals reduced migration of SRF KO EPDCs (arrows) across the basement membrane. Migration was quantified and presented as a percentage of all GFP positive cells **(D)**. **(E, F)** Scratch assay on EPDCs isolated from *Srf*<sup>fl/fl</sup> embryos transduced with Ad/ $\beta$ gal (Control) or Ad/Cre (SRF KO). Images were captured at the indicated time points **(E)** and migration was quantified as a percent of original scratch area **(F)**. Statistical differences in **(F)** were determined using a two-way ANOVA and Tukey post-hoc test. ( $n = 4$  for each condition). **(G, H)** Immunostaining for Ki-67 on EPDCs isolated from *Mrtfa*<sup>-/-</sup>; *Mrtfb*<sup>fl/fl</sup> embryos and transduced with control or Cre adenoviruses. Images were captured 16 hours after scratch and quantified as percent Ki-67 positive nuclei at the leading edge of migration or throughout the explant **(H)**. Data are presented as the mean $\pm$ s.e.m. ( $n = 5$  (Control), and  $n = 7$  (dKO), data represent at least two independent experiments). NS, not significant using a two-way ANOVA. \* $P < 0.05$ ; \*\* $P < 0.01$ ; \*\*\* $P < 0.001$ ; and \*\*\*\* $P < 0.0001$ . Scale bars: 25  $\mu$ m (A, C) or 100  $\mu$ m (E, G).



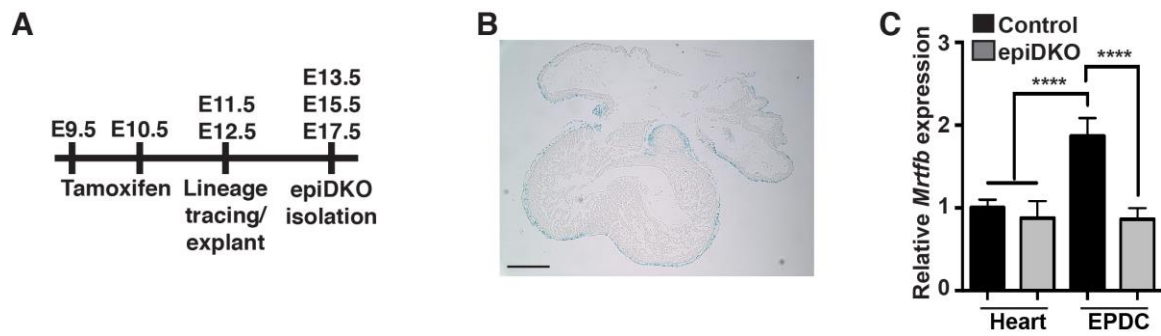

**Fig. S4. Epicardium-specific recombination with  $WT1^{CreERT2}$**

(A) Experimental timeline for generating and analyzing  $MRTF^{epiDKO}$  embryos. (B)  $\beta$ -gal expression in E12.5  $Wt1^{Cre/ERT2}; Rosa^{lacZ}$  heart. (C) qPCR analysis confirms *Mrtfb* deletion is restricted to the epicardium of E11.5  $MRTF^{epiDKO}$  hearts. [ $n = 3$  (Control) and  $n = 5$  ( $MRTF^{epiDKO}$ )]. \*\*\*\*  $P < 0.0001$ .

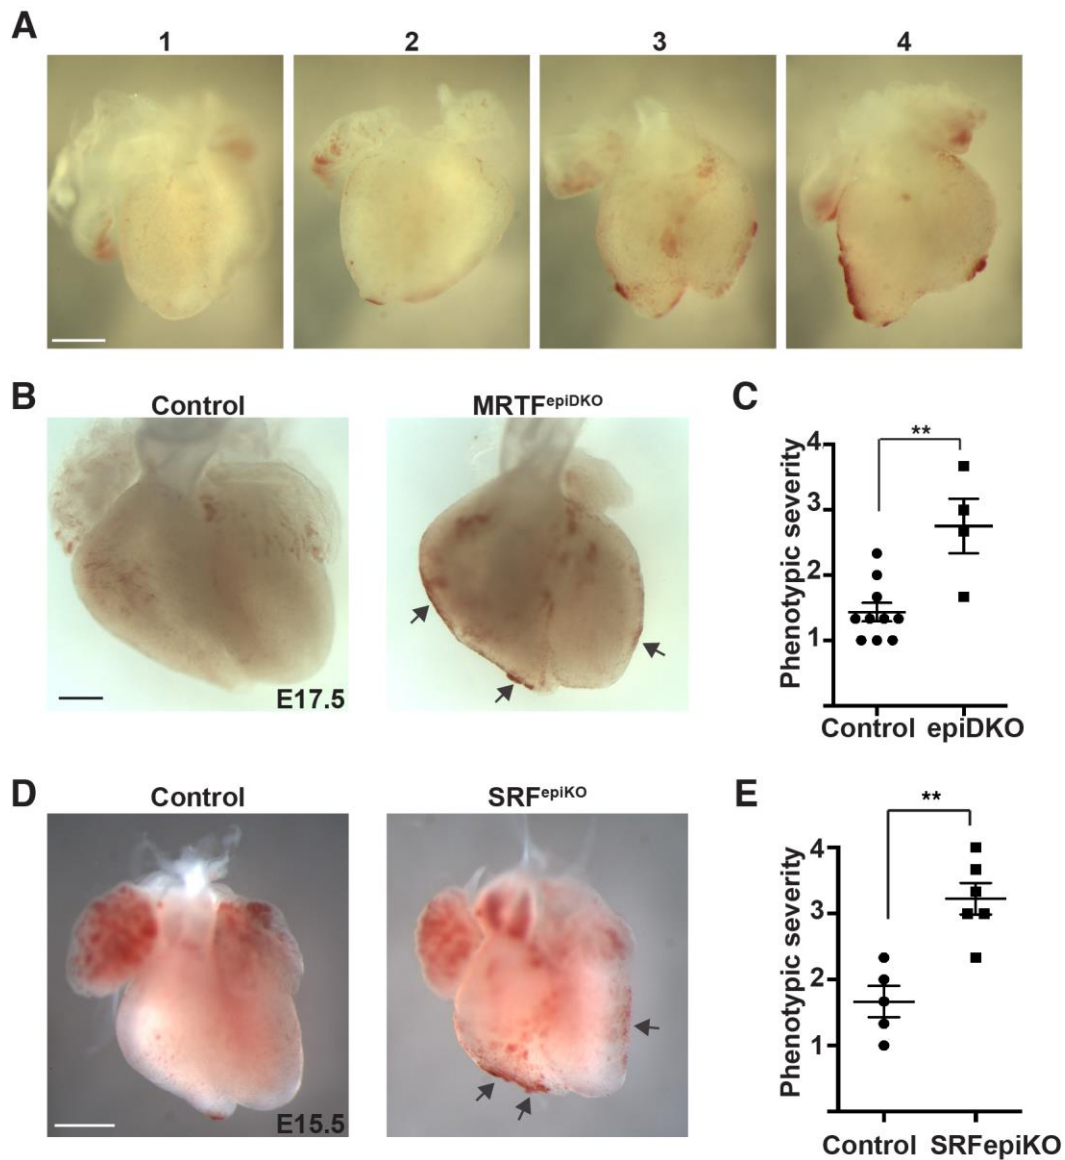

**Fig. S5. Sub-epicardial hemorrhage phenotype in  $MRTF^{epiDKO}$  and  $SRF^{epiKO}$**

(A) Range of sub-epicardial hemorrhaging displayed by E15.5  $MRTF^{epiDKO}$  hearts, “4” being the most severe. This phenotypic scale was used by three blinded reviewers to score hearts. (B) Gross morphology of E17.5  $MRTF^{epiDKO}$  hearts display sub-epicardial hemorrhaging, indicated by arrows. (C) Hemorrhage severity scored at E17.5. [ $n = 11$  (Control), and  $n = 4$  ( $MRTF^{epiDKO}$ )]. (D) Gross morphology of E15.5-E16.5 hearts isolated from  $Wtl^{CreBAC/+};Srf^{fl/fl}$  ( $SRF^{epiKO}$ ) and  $Wtl^{+/+};Srf^{fl/fl}$  (Control)

embryos demonstrating a sub-epicardial hemorrhage phenotype in  $\text{SRF}^{\text{epiKO}}$ . (E).  
Quantification of hemorrhage phenotype. All data are presented as the mean  $\pm$  s.e.m.  
( $n = 5$  (Control), and  $n = 6$  ( $\text{SRF}^{\text{epiKO}}$ ), data represent the combined results of three  
independent litters).  $**P < 0.01$  using a Mann Whitney test. Scale bars: 500  $\mu\text{m}$ .

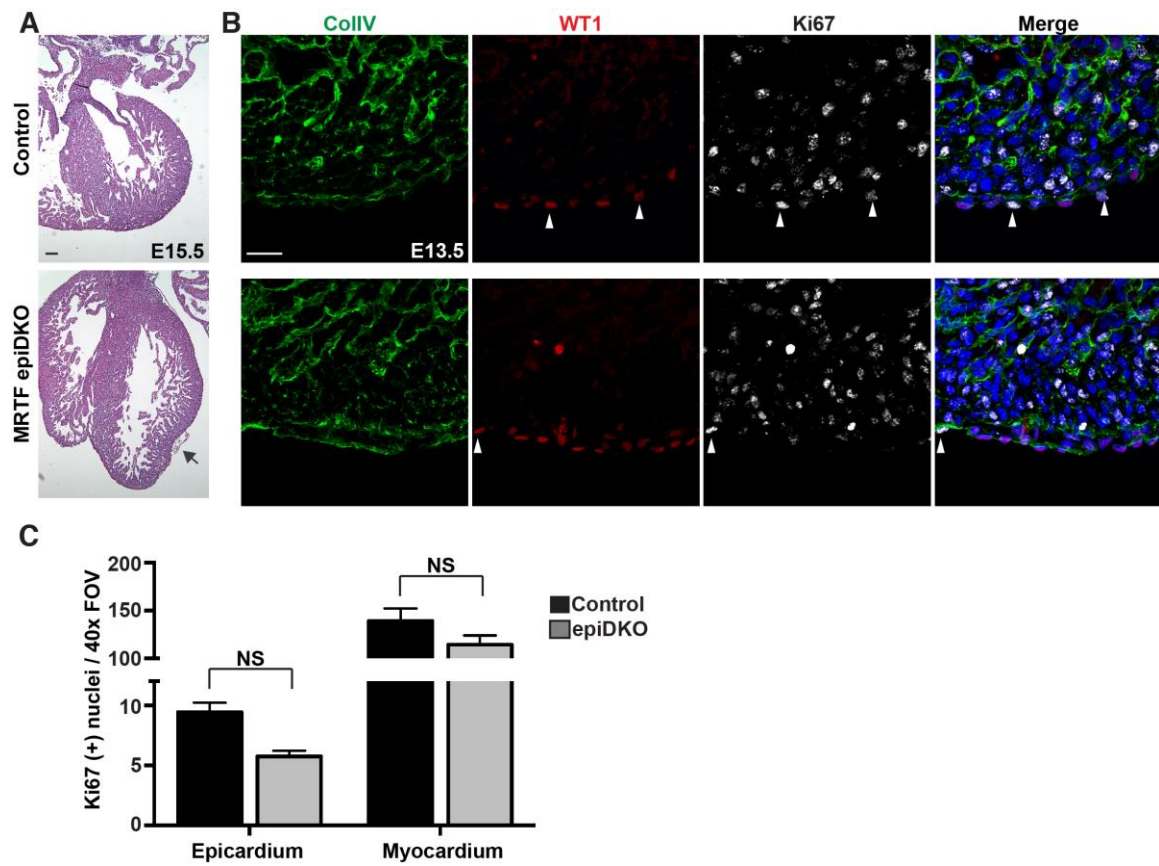

**Fig. S6. Epicardial adherence and proliferation defects in MRTF<sup>epiDKO</sup>**

(A) H&E stain depicting epical dissociation (arrow) from the underlying myocardium in E15.5 MRTF<sup>epiDKO</sup> hearts. (B) Immunostaining for CollIV (green), WT1 (red), and Ki-67 (white) reveals cell proliferation at E13.5. Merged image includes Dapi staining of nuclei. (C) Ki-67 positive nuclei per 40X field of view were quantified within the epicardium and myocardium. Data are presented as the mean ± s.e.m. ( $n = 4$  (Control) and  $n = 8$  (MRTF<sup>epiDKO</sup>), data represent the combined results of two independent litters). NS, not significant using a two-way ANOVA. Scale bars: 100  $\mu\text{m}$  (A) or 25  $\mu\text{m}$  (B).

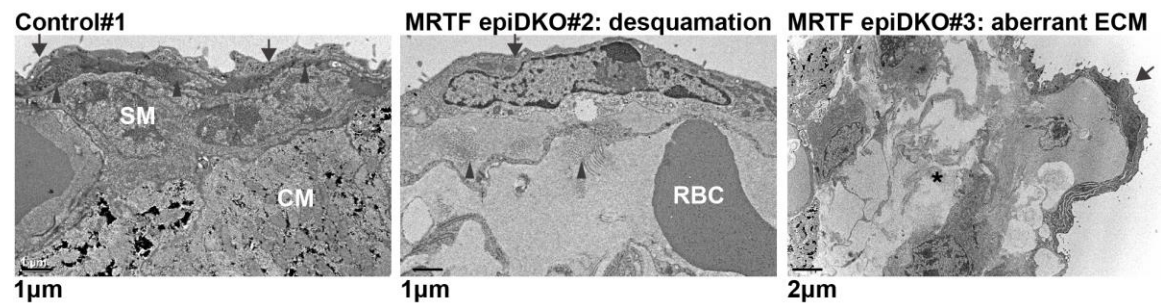

**Fig. S7. Ultrastructural analysis of epicardium**

TEM of E15.5 control and MRTF<sup>epiDKO</sup> hearts. Ultrastructure reveals an organized epithelial layer (arrows) and closely associated basal lamina (arrowheads) in the control heart. MRTF<sup>epiDKO</sup> hearts display desquamation from the subjacent myocardium, epicardial detachment, and an accumulation of disorganized ECM (asterisk) underlying the epicardium. [ $n = 2$  (Control) and  $n = 3$  (MRTF<sup>epiDKO</sup>)]. CM, cardiac myocyte; RBC, red blood cell; SM, sub-epicardial mesenchymal cell.

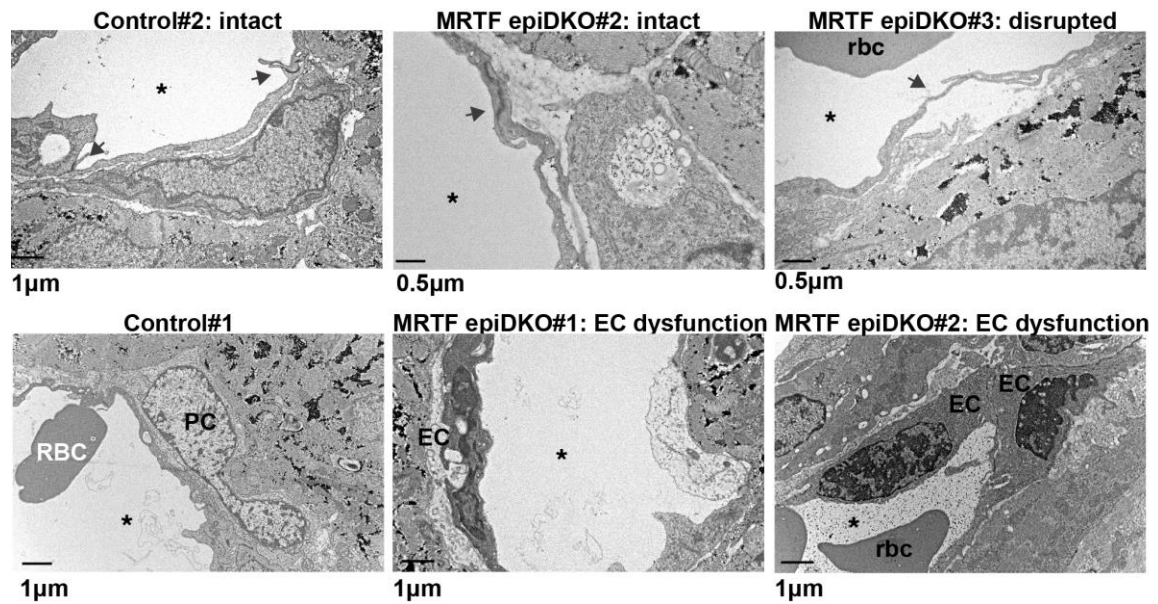

**Fig. S8. Ultrastructural analysis of sub-epicardial microvessels**

TEM of E15.5 control and MRTF<sup>epiDKO</sup> hearts. Control hearts display intact vessels with electron dense tight junctions (arrows) between endothelial cells. Some MRTF<sup>epiDKO</sup> vessels also have intact tight junctions, whereas others display disrupted junctional integrity and occasional EC dysfunction with electron dense chromatin. [ $n = 2$  (Control) and  $n = 3$  (MRTF<sup>epiDKO</sup>)]. EC, endothelial cell; PC, pericyte; RBC, red blood cell; asterick denotes lumen.



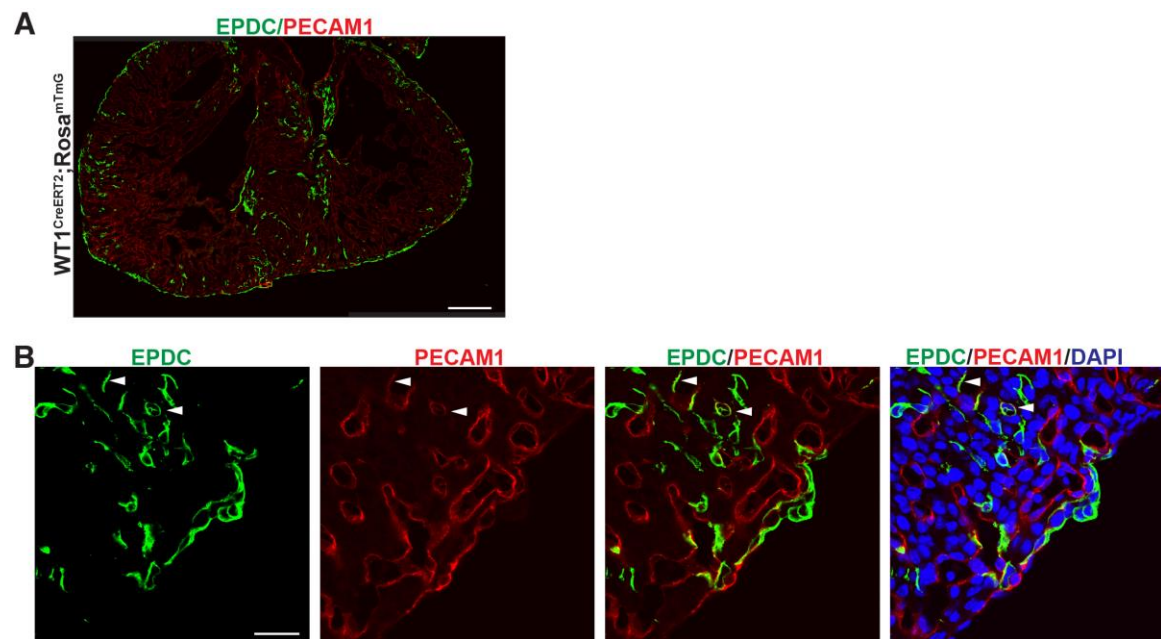

**Fig. S9. WT<sup>CreERT2</sup>; Rosa<sup>mTmG</sup> lineage tracing**

(A) Detection of the epicardium-derived lineage in *Wt1<sup>CreERT2</sup>;Rosa<sup>mTmG</sup>* hearts at E15.5 with an anti-GFP antibody (green) following tamoxifen administration at E9.5 and E10.5. GFP positive cells are present in the epicardium and descendants of the epicardium in the sub-epicardium, compact myocardium and interventricular septum. Co-staining for PECAM1 (red) identifies ECs. Image is a composite of two separate 10X images. Scale bar: 200  $\mu\text{m}$ . (B) 80X magnification of a representative heart demonstrates EPDC in close apposition with, but generally distinct from, PECAM1-positive ECs. Arrowheads denote two ECs that co-stain with GFP. Scale bars: 50  $\mu\text{m}$  (A) and 25  $\mu\text{m}$  (B).

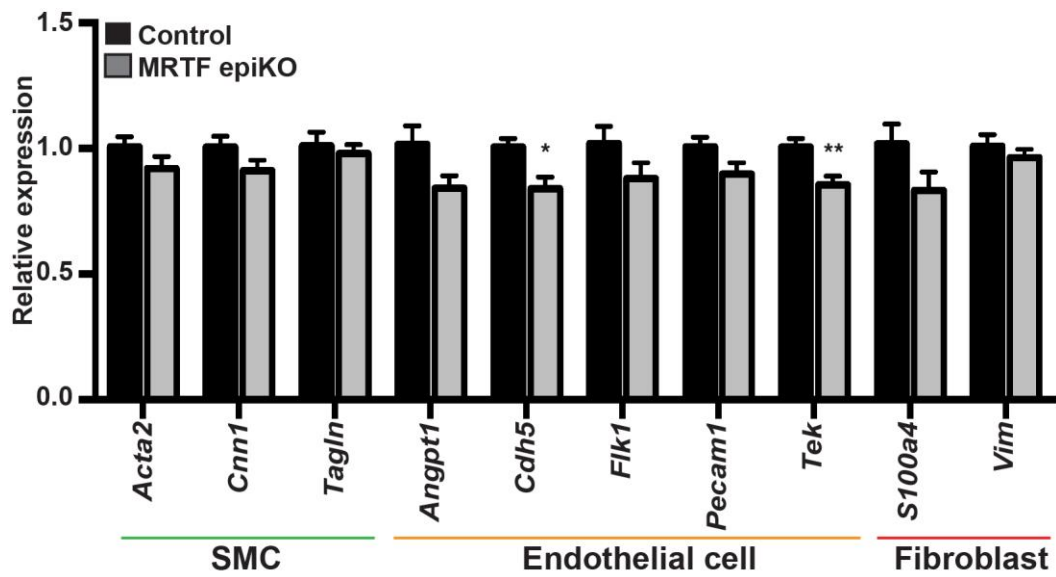

**Fig. S10. Gene expression analysis in E15.5 MRTF<sup>epiDKO</sup> hearts**

qPCR analysis of SMC, endothelial cell and fibroblast markers in whole ventricles isolated from control and MRTF<sup>epiDKO</sup> embryos at E15.5. Data are presented as the mean  $\pm$  s.e.m. (n = 9 (Control) and n = 14 (epiDKO), data represent the combined results of three independent litters). \*  $P < 0.05$ ; \*\*  $P < 0.01$ .

**Supplemental Tables**

**Table S1. Progeny from MRTF<sup>epiDKO</sup> intercrosses**

Embryos were isolated at the indicated times from *Wt1*<sup>+/+</sup>; *Mrtfa*<sup>-/-</sup>; *Mrtfb*<sup>fl/fl</sup> dams crossed to *Wt1*<sup>CreERT2/+</sup>; *Mrtfa*<sup>-/-</sup>; *Mrtfb*<sup>fl/fl</sup> sires following tamoxifen administration of the dam at E9.5 and E10.5.

| <b>Age</b> | <b><i>Wt1</i><sup>CreERT2/+</sup>; <i>Mrtfa</i><sup>-/-</sup>;<br/><i>Mrtfb</i><sup>fl/fl</sup></b> | <b><i>Wt1</i><sup>+/+</sup>; <i>Mrtfa</i><sup>-/-</sup>;<br/><i>Mrtfb</i><sup>fl/fl</sup></b> | <b>Total</b> |
|------------|-----------------------------------------------------------------------------------------------------|-----------------------------------------------------------------------------------------------|--------------|
| E11.5      | 19 (49%)                                                                                            | 20 (51%)                                                                                      | 39           |
| E13.5      | 37 (60%)                                                                                            | 25 (40%)                                                                                      | 62           |
| E15.5      | 48 (61%)                                                                                            | 31 (39%)                                                                                      | 79           |
| E17.5      | 10 (34%) <sup>ψ</sup>                                                                               | 19 (66%) <sup>δ</sup>                                                                         | 29           |

Data are presented as number (percentage).

Observed frequencies were not significantly different from the expected frequencies by Chi-square analysis.

<sup>ψ</sup>one or <sup>δ</sup>two additional resorbing embryos were recovered.

**Table S2. Progeny from MRTF<sup>BACdKO</sup> intercrosses**

Survival of pups was monitored at the indicated times from *Wt1*<sup>+/+</sup>; *Mrtfa*<sup>+/-</sup>; *Mrtfb*<sup>fl/fl</sup> dams crossed to *Wt1*<sup>CreBAC/+</sup>; *Mrtfa*<sup>-/-</sup>; *Mrtfb*<sup>fl/fl</sup> sires.

| <b>Age</b> | <b><i>Wt1</i><sup>CreBAC/+</sup>;<br/><i>Mrtfa</i><sup>-/-</sup>;<br/><i>Mrtfb</i><sup>fl/fl</sup></b> | <b><i>Wt1</i><sup>CreBAC/+</sup>;<br/><i>Mrtfa</i><sup>+/-</sup>;<br/><i>Mrtfb</i><sup>fl/fl</sup></b> | <b><i>Wt1</i><sup>+/+</sup>;<br/><i>Mrtfa</i><sup>-/-</sup>;<br/><i>Mrtfb</i><sup>fl/fl</sup></b> | <b><i>Wt1</i><sup>+/-</sup>;<br/><i>Mrtfa</i><sup>+/-</sup>;<br/><i>Mrtfb</i><sup>fl/fl</sup></b> | <b>Total</b> |
|------------|--------------------------------------------------------------------------------------------------------|--------------------------------------------------------------------------------------------------------|---------------------------------------------------------------------------------------------------|---------------------------------------------------------------------------------------------------|--------------|
| P0         | 16 (19%)                                                                                               | 25 (29%)                                                                                               | 18 (21%)                                                                                          | 26 (31%)                                                                                          | 85           |
| P1         | 12 (15%) <sup>ψ</sup>                                                                                  | 25 (31%)                                                                                               | 18 (22%)                                                                                          | 26 (32%)                                                                                          | 81           |
| P2         | 11 (13%) <sup>δ</sup>                                                                                  | 25 (32%)                                                                                               | 18 (23%)                                                                                          | 25 (32%) <sup>δ</sup>                                                                             | 79           |
| P3         | 11 (13%)                                                                                               | 25 (32%)                                                                                               | 18 (23%)                                                                                          | 25 (32%)                                                                                          | 79           |
| P4         | 11 (14%)                                                                                               | 24 (31%) <sup>δ</sup>                                                                                  | 18 (24%)                                                                                          | 24 (31%) <sup>δ</sup>                                                                             | 77           |
| P51        | 11 (14%)                                                                                               | 24 (32%)                                                                                               | 18 (24%)                                                                                          | 23 (30%) <sup>δ</sup>                                                                             | 76           |

Data are presented as number (percentage).

Observed frequencies were not significantly different from the expected frequencies by Chi-square analysis.

*P*=0.0113 by Logrank test of survival proportions.

<sup>ψ</sup>four or <sup>δ</sup>one pups were recovered dead.

**Table S3. Antibodies used for immunostaining**

Information regarding antibodies used for immunostaining, including antigen, source, host, dilution, and staining method.

| <b>Antigen</b> | <b>Source</b>               | <b>Host</b> | <b>Dilution</b> | <b>Protocol</b> |
|----------------|-----------------------------|-------------|-----------------|-----------------|
| ACTA2          | Sigma (Clone 1A4, C6198)    | Mouse       | 1:200           | Cell culture    |
| COLIV          | Millipore (AB756P)          | Rabbit      | 1:200           | Cryosection     |
| CSPG4          | Millipore (AB5320)          | Rabbit      | 1:150           | Cryosection     |
| GFP            | AbCam (ab13970)             | Chicken     | 1:400           | Cryosection     |
| HA             | Cell Signaling (3724)       | Rabbit      | 1:200           | Cell culture    |
| Ki-67          | DAKO (clone TEC-3, M7249)   | Rat         | 1:300           | Cell culture    |
|                |                             |             | 1:1,000         | Paraffin        |
| MRTF           | Kind gift from Guido Posern | Rabbit      | 1:100           | Paraffin        |
|                |                             |             | 1:200           | Cell culture    |
| PECAM1         | BD Pharmingen (550274)      | Rat         | 1:200           | Cryosection     |
| PDGFR $\beta$  | R&D Systems (AF1042)        | Goat        | 1:200           | Cryosection     |
| TnnT2          | Thermo Fisher (MS-295)      | Mouse       | 1:100           | Paraffin        |
| VCL            | AbCam (ab11194)             | Mouse       | 1:150           | Cell Culture    |
| WT1            | Thermo Fisher (MS-1837)     | Mouse       | 1:100           | Paraffin        |
| ZO1            | Invitrogen (402200)         | Rabbit      | 1:200           | Cell culture    |

**Table S4. Primers used in RT-PCR studies**

Sequence of forward and reverse primers and PCR conditions used in standard and

| <b>Gene</b>               | <b>Forward</b>           | <b>Reverse</b>           |
|---------------------------|--------------------------|--------------------------|
| <i>Acta2</i>              | G TTCAGTGGTGCCTCTGTCA    | ACTGGGACGACATGGAAAAG     |
| <i>Angpt1</i>             | CATCAGCTCAATCCTCAGC      | GGGGGAGGTTGGACAGTAA      |
| <i>Cdh5</i>               | CAGCAACTTCACCCTCATAAAC   | TCCCGATTAAACTGCCCATAC    |
| <i>Cnn1</i>               | GAAGGTCAATGAGTCAACTCAGAA | CCATACTTGGTAATGGCTTTGA   |
| <i>Col1a2</i>             | AGCAGGTCCCTTGGAAACCTT    | AAGGAGTTTCATCTGGCCCT     |
| <i>Col3a1</i>             | TAGGACTGACCAAGGTGGCT     | GGAACCTGGTTTCTTCTCACC    |
| <i>Cspg4</i>              | TCTTACCTTGGCCTTGTGG      | ATGTGGAGAACTGGAGCAGC     |
| <i>Flk1</i>               | TCTGTGGTTCTGCGTGGAGA     | GTATCATTTCCAACCACCCT     |
| <i>Fn1</i>                | AGACCTGGGAAAAGCCCTACCAA  | ACTGAAGCAGGTTTCTCGGTTGT  |
| <i>Gapdh</i> <sup>†</sup> | CGTGCCGCCTGGAGAAAC       | TGGGAGTTGCTGTTGAAGTCG    |
| <i>Krt14</i>              | ATCGAGGACCTGAAGAGCAA     | TCGATCTGCAGGAGGACATT     |
| <i>Mrtfa</i>              | ACGAGGCGGTTACCATCAC      | GCAGACAGAGACAGGAGCAC     |
| <i>Mrtfb</i> <sup>†</sup> | TCCCGTGCTCCCTACAA        | CGGTGTTTGTGCTTTGGATTG    |
| <i>Myh7</i>               | GTGGCTCCGAGAAAGGAAG      | GAGCCTTGGATTCTCAAACG     |
| <i>Mylk</i>               | AAAAACCGTCTGGACTGCAC     | TCACAGCATTGCCGTTTTTC     |
| <i>Myocd</i>              | AAGGTCCATTCCAAGTCTC      | CCATCTCTACTGCTGTCATCC    |
| <i>Nkx2-5</i>             | GACGTAGCCTGGTGTCTCG      | GTGTGGAATCCGTCGAAAGT     |
| <i>Pdgfrβ</i>             | GGGAGACACTGGGAATACTTTTG  | TGAACAGGTCCTCGGAGTCCATAG |
| <i>Pecam1</i>             | TGGTTGTCATTGGAGTGGTC     | TTCTCGCTGTTGGAGTTCAG     |
| <i>Rock1</i>              | AAGCTTTTGTGGCAATCAGC     | AACTTTCCTGCAAGCTTTTATCCA |
| <i>S100a4</i>             | CTTCTCTCTCTTGGTCTGGTC    | TTTGTGGAAGGTGGACACAA     |
| <i>Snai1</i>              | CTTGTGTCTGCACGACCTGT     | AGGAGAATGGCTTCTCACCA     |
| <i>Snai2</i>              | CATTGCCTTGTGTCTGCAAG     | CAGTGAGGGCAAGAGAAAGG     |
| <i>Srf</i>                | CCACCACAGACCAGAGAATGAG   | TCTTGAGCACAGTCCCCTTG     |
| <i>Tagln</i>              | GACTGCACTTCTCGGCTCAT     | CCGAAGCTACTCTCCTTCCA     |
| <i>Tek</i>                | ACCTCCAGTGGATCTTGGTG     | TGGAGTCAGCTTGCTCCTTT     |
| <i>Tcf21</i>              | CATTCACCCAGTCAACCTGA     | CCACTTCCTTCAGGTCATTCTC   |
| <i>Tmsb4x</i>             | ATGTCTGACAAACCCGATATGGC  | CCAGCTTGCTTCTCTTGTTC     |
| <i>Tpm1</i>               | GAAGCCTCATGAGAACAGAACCA  | CTTCTGCTGATCCCACCAT      |
| <i>Twist1</i>             | CGGACAAGCTGAGCAAGAT      | GGACCTGGTACAGGAAGTCG     |
| <i>Vcl</i>                | AACCAGCCAATGATGATGGC     | TTGGCTGCTGCAATGATGTC     |
| <i>Vim</i>                | GACATTGAGATCGCCACCTA     | GGCAGAGAAATCCTGCTCTC     |
| <i>Wt1</i>                | ATCCGCAACCAAGGATACAG     | GGTCCTCGTGTGTTGAAGGAA    |

qPCR parameters: denature 95°C, 10 sec; annealing 60°C, 30 sec; 50x cycles.

<sup>†</sup>RT-PCR parameters: 95°C, 3 min; 95°C, 30 sec; 52°C, 30 sec; 72°C, 30 sec; 72°C, 5 min 35x cycles. quantitative RT-PCR reactions.
